# Supplementary material for: A fluorinated SEI layer induced by a fire-retardant gel polymer electrolyte boosting lateral dendrite growth
Source: Royal Society of Chemistry journal article supplement (doi:10.1039/d2ta04894a), 2022-01-01
Supplement: d2ta04894a1.pdf [file d2ta04894a1.pdf]

# Supporting Information

## Fluorinated SEI Layer Induced by a Fire-Retardant Gel Polymer

### Electrolyte Boosting Lateral Dendrite Growth

Ziyue Wen <sup>a</sup>, Zhikun Zhao <sup>a</sup>, Ting Zhang<sup>a</sup>, Yuanshen Wang <sup>a</sup>, Jinxiang Zhang<sup>a</sup>,  
Zhaoyang Sun<sup>a</sup>, Li Li <sup>a,b,c</sup>, Yuejiao Li <sup>a\*</sup>, Feng Wu <sup>a,b,c,\*</sup> and Renjie Chen <sup>a,b,c,\*</sup>

<sup>a</sup> School of Material Science & Engineering, Beijing Key Laboratory of Environmental Science and Engineering, Beijing Institute of Technology, Beijing100081, China.

<sup>b</sup> Institute of Advanced Technology, Beijing Institute of Technology, Jinan 250300, China.

<sup>c</sup> Collaborative Innovation Center of Electric Vehicles in Beijing, Beijing 100081, China

\*Corresponding author:

Email address: [chenrj@bit.edu.cn](mailto:chenrj@bit.edu.cn); [wufeng863@bit.edu.cn](mailto:wufeng863@bit.edu.cn); [lyj@bit.edu.cn](mailto:lyj@bit.edu.cn)

Tel: +86-10-68912508 Fax:+86-10-68451429

#### **This PDF file includes:**

Figure S1. The digital photo of serials TPEs.

Figure S2. The temperature test from 30 to 110 °C for PP membrane and TPEs.

Figure S3. SEM images of cycled Li metal surface at different magnifications.

Figure S4. SEM images of cycled TPE surface at different magnifications.

Figure S5. SEM images of TPE-1.5 and Li metal/TPE-1.5 electrolyte cross section at

different magnifications.

Figure S6. The optical images of Li surface collected by ThermoFisher Nicolet iN10.

Figure S7. P 2p XPS spectra at various etching depth.

Figure S8. The galvanostatic charge-discharge performance of Li|LFP full batteries with different TPEs at 0.5 C rate.

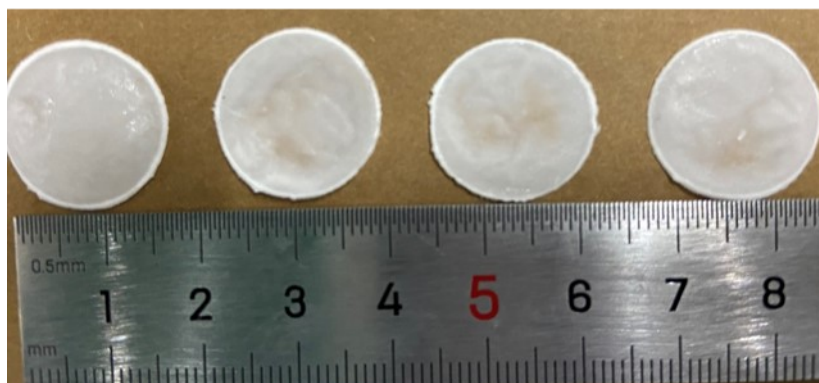

Figure S1. The digital photo of serials TPEs.

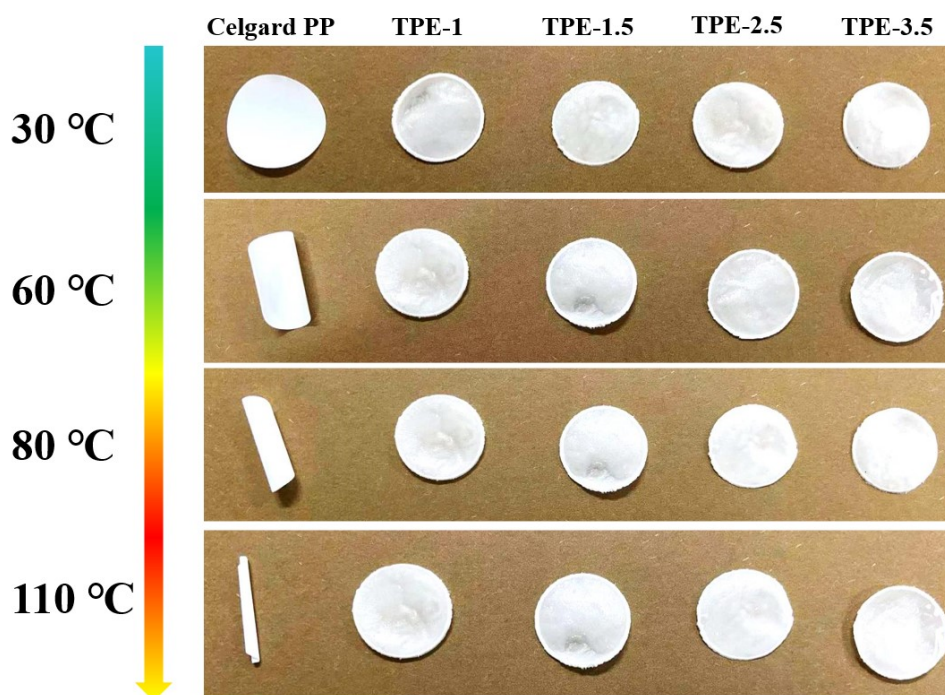

Figure S2. The temperature test from 30 to 110 °C for PP membrane and TPEs.

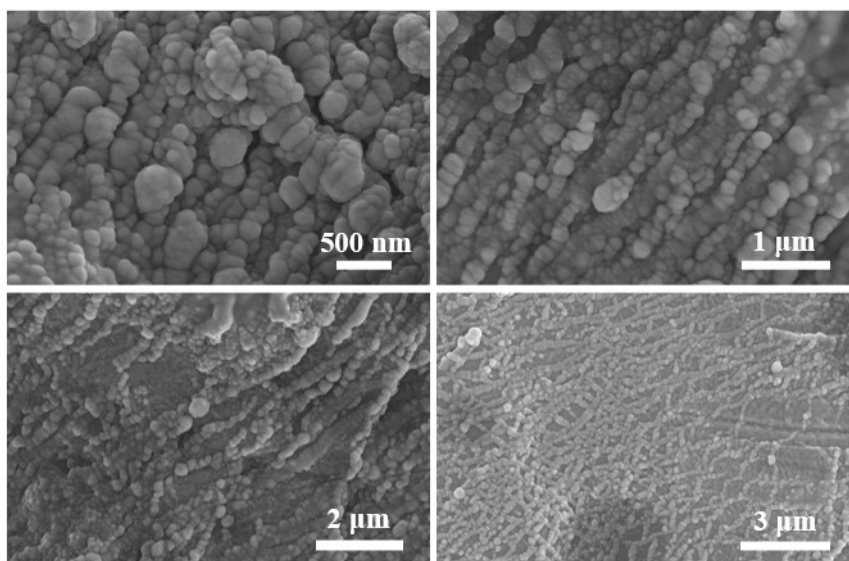

Figure S3. SEM images of cycled Li metal surface at different magnifications.

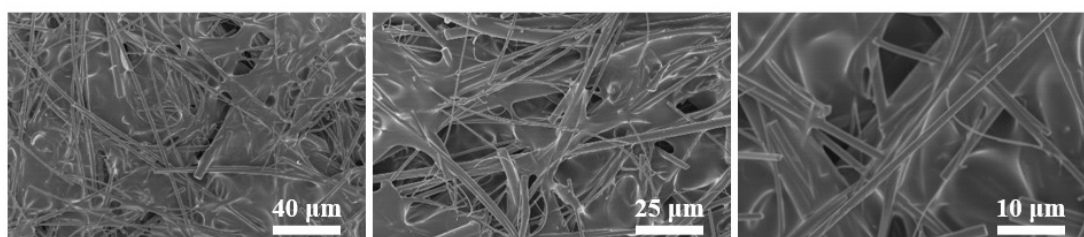

Figure S4. SEM images of cycled TPE surface at different magnifications.

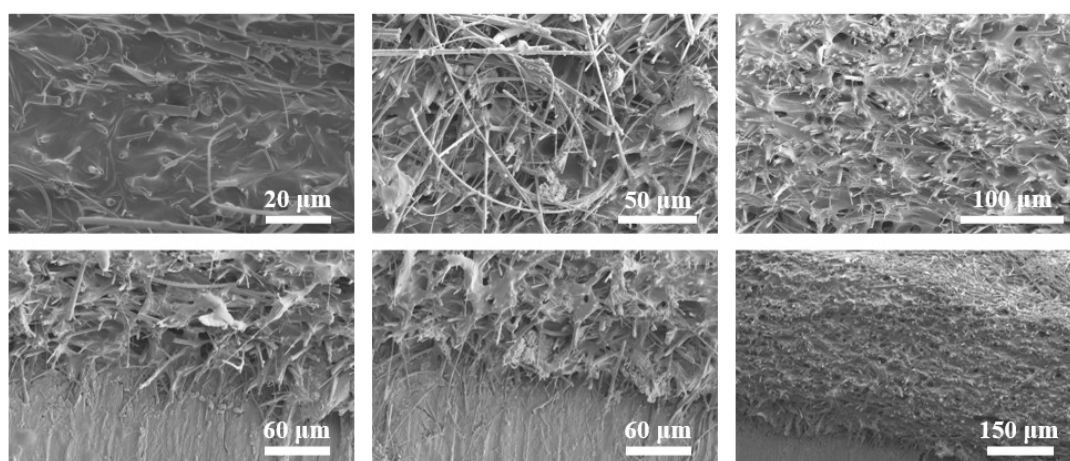

Figure S5. SEM images of TPE-1.5 and Li metal/TPE-1.5 electrolyte cross section at different magnifications.

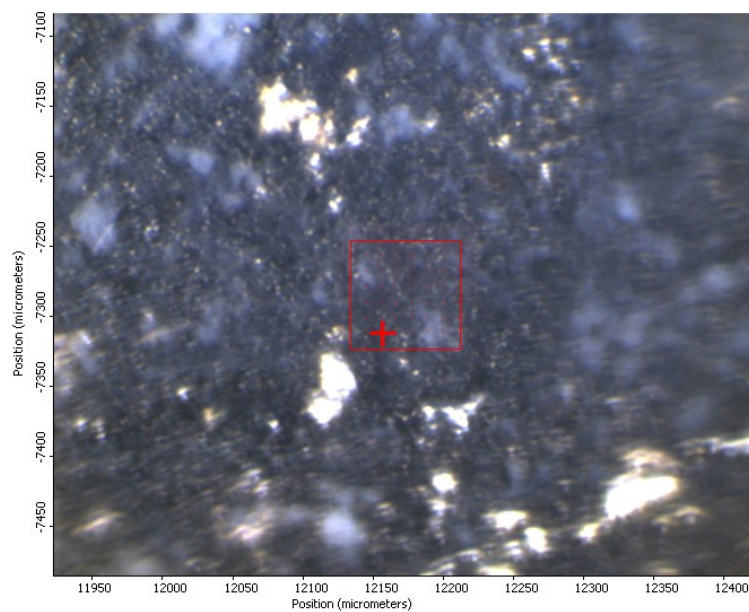

Figure S6. The optical images of Li surface collected by ThermoFisher Nicolet iN10.

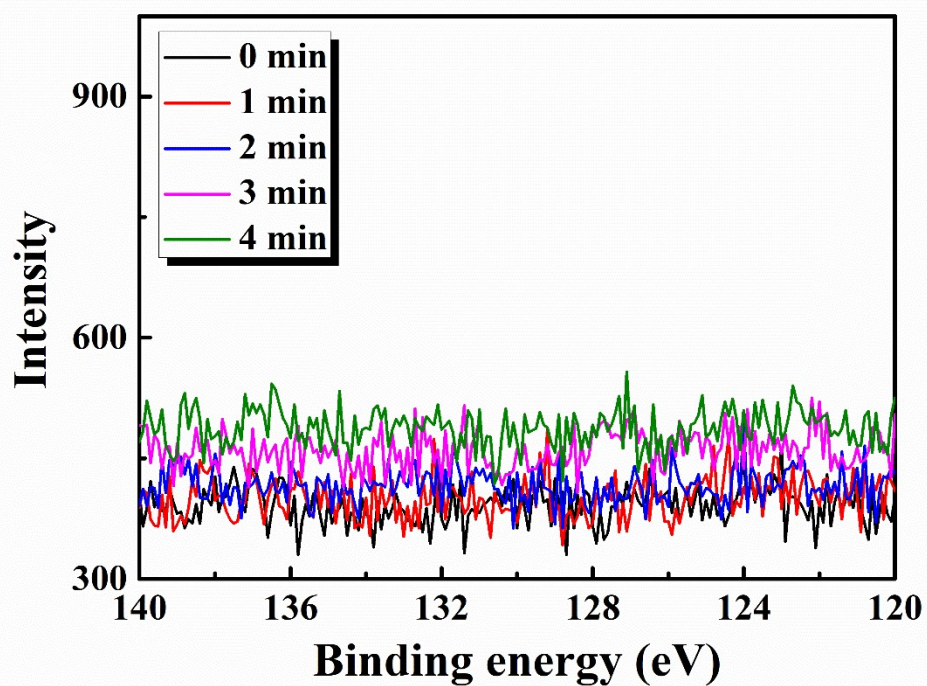

Figure S7. P 2p XPS spectra at various etching depth.

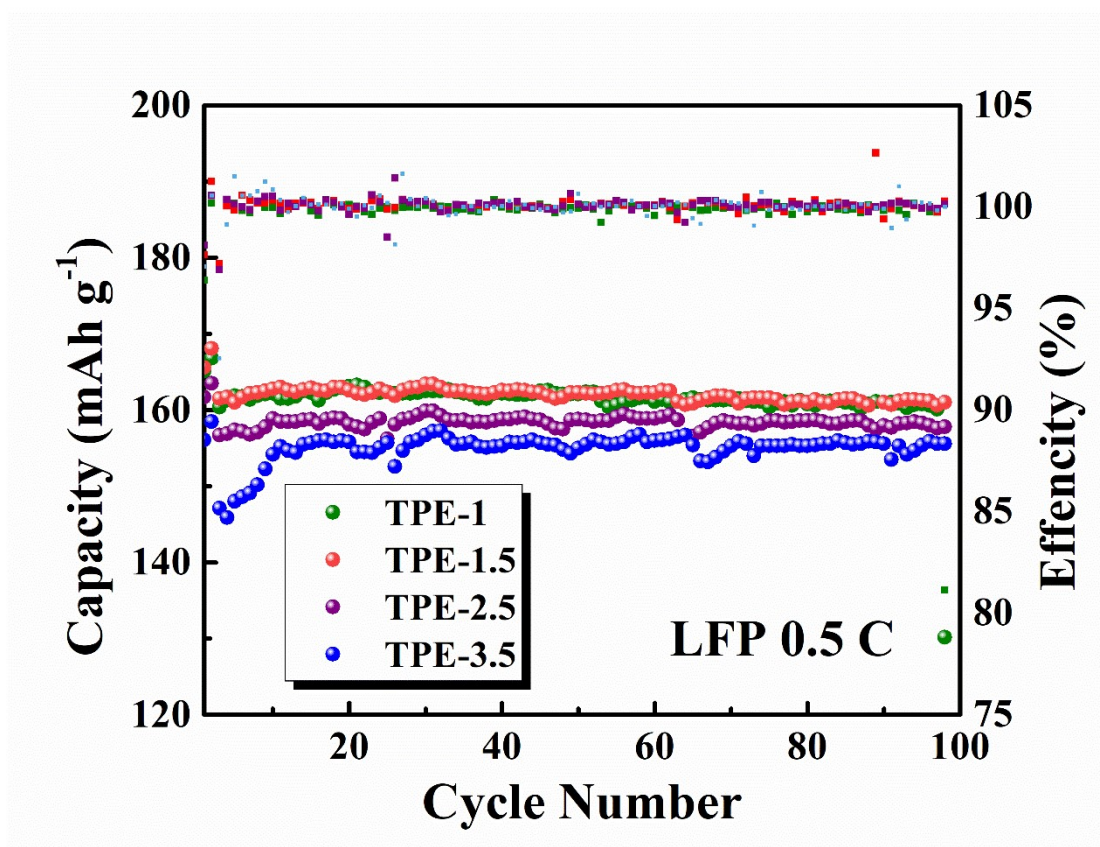

Figure S8. The galvanostatic charge-discharge performance of Li|LFP full batteries with different TPEs at 0.5 C rate.
